# Supplementary material for: Identification of a methylation profile for DNMT1-associated autosomal dominant cerebellar ataxia, deafness, and narcolepsy
Source: PubMed Central journal article supplement (PMC5011850; doi:10.1186/s13148-016-0254-x), 2016-09-05
Supplement: 13148_2016_254_MOESM1_ESM.pdf [file 13148_2016_254_MOESM1_ESM.pdf]

**Supplementary Table 1: Significant regions detected by methylation array in ADCA-DN versus control individuals**

| <b>Chr</b> | <b>Region start</b> | <b>Region end</b> | <b>Meth. average</b> | <b># probes</b> | <b>Estimate</b> | <b>Nearest gene</b> | <b>Distance to nearest gene</b> | <b>Distance to nearest CpG island</b> |
|------------|---------------------|-------------------|----------------------|-----------------|-----------------|---------------------|---------------------------------|---------------------------------------|
| chr16      | 67223723            | 67224639          | 0.751                | 5               | 0.22            | EXOC3L1 (-)         | 0                               | 4503                                  |
| chr3       | 46618658            | 46619374          | 0.659                | 5               | 0.23            | TDGF1 (+)           | 0                               | 0                                     |
| chr3       | 16216084            | 16216616          | 0.639                | 5               | 0.20            | GALNT15 (+)         | 0                               | 89521                                 |
| chr15      | 29213240            | 29213870          | 0.600                | 7               | 0.21            | APBA2 (+)           | 0                               | 81031                                 |
| chr7       | 150885074           | 150885664         | 0.599                | 5               | 0.20            | ASB10 (-)           | 154                             | 13037                                 |
| chr14      | 94461903            | 94462617          | 0.591                | 5               | 0.20            | LINC00521 (+)       | 999                             | 30023                                 |
| chr6       | 32158917            | 32159617          | 0.526                | 6               | 0.22            | GPSM3 (-)           | 0                               | 3676                                  |
| chr6       | 30853245            | 30853618          | 0.500                | 5               | 0.25            | DDR1 (+)            | 0                               | 568                                   |
| chr6       | 28555643            | 28555939          | 0.492                | 5               | 0.22            | ZBED9 (-)           | 530                             | 518                                   |
| chr6       | 33240458            | 33241036          | 0.458                | 5               | 0.30            | RPS18 (+)           | 0                               | 358                                   |
| chr12      | 6745047             | 6745578           | 0.420                | 6               | 0.21            | LPAR5 (-)           | 0                               | 10424                                 |
| chr11      | 32449153            | 32450114          | 0.367                | 7               | 0.29            | WT1 (-)             | 0                               | 0                                     |
| chr17      | 21355997            | 21356382          | 0.365                | 5               | 0.26            | KCNJ18 (+)          | 35514                           | 0                                     |
| chr2       | 19553227            | 19553960          | 0.361                | 5               | 0.22            | OSR1 (-)            | 0                               | 0                                     |
| chr5       | 134872114           | 134872669         | 0.303                | 8               | 0.21            | NEUROG1 (-)         | 474                             | 62                                    |
| chr8       | 48099605            | 48100196          | 0.300                | 5               | 0.22            | LOC100287846 (+)    | 734                             | 0                                     |
| chr2       | 39187523            | 39188016          | 0.297                | 6               | 0.20            | ARHGEF33 (+)        | 0                               | 0                                     |
| chr5       | 2749705             | 2750768           | 0.295                | 5               | 0.23            | IRX2 (-)            | 0                               | 0                                     |
| chr19      | 18343292            | 18344332          | 0.279                | 5               | 0.22            | PDE4C (-)           | 0                               | 0                                     |

|       |           |           |       |    |      |                  |       |       |
|-------|-----------|-----------|-------|----|------|------------------|-------|-------|
| chr4  | 298671    | 299380    | 0.279 | 9  | 0.22 | ZNF732 (-)       | 8726  | 0     |
| chr1  | 47898901  | 47899686  | 0.275 | 5  | 0.23 | FOXD2-AS1 (-)    | 0     | 0     |
| chr2  | 132182294 | 132183118 | 0.250 | 5  | 0.20 | LINC01120 (+)    | 16492 | 0     |
| chr19 | 52390800  | 52391377  | 0.237 | 10 | 0.34 | ZNF649-AS1 (+)   | 0     | 0     |
| chr5  | 140419809 | 140420528 | 0.222 | 6  | 0.30 | LOC101926905 (-) | 5262  | 55072 |
| chr3  | 153840099 | 153840728 | 0.218 | 8  | 0.23 | ARHGEF26 (+)     | 0     | 0     |
| chr2  | 177003396 | 177004025 | 0.216 | 5  | 0.25 | HOXD-AS2 (-)     | 1569  | 428   |
| chr1  | 75593794  | 75594271  | 0.214 | 6  | 0.21 | LHX8 (+)         | 0     | 1543  |
| chr6  | 137813574 | 137814366 | 0.213 | 5  | 0.22 | OLIG3 (-)        | 0     | 0     |
| chr4  | 174442533 | 174443376 | 0.209 | 5  | 0.20 | HAND2 (-)        | 4276  | 0     |
| chr4  | 5894681   | 5895420   | 0.207 | 5  | 0.28 | CRMP1 (-)        | 0     | 0     |
| chr13 | 36048882  | 36050168  | 0.203 | 6  | 0.25 | MIR548F5 (-)     | 0     | 0     |
| chr6  | 100903681 | 100904386 | 0.199 | 7  | 0.20 | SIM1 (-)         | 0     | 0     |
| chr14 | 57276779  | 57277771  | 0.198 | 6  | 0.24 | OTX2 (-)         | 0     | 0     |
| chr4  | 54974634  | 54975687  | 0.198 | 7  | 0.20 | GSX2 (+)         | 6511  | 0     |
| chr5  | 115297680 | 115298730 | 0.195 | 9  | 0.24 | AQPEP (+)        | 0     | 0     |
| chr7  | 155301724 | 155303308 | 0.191 | 7  | 0.30 | CNPY1 (-)        | 0     | 0     |
| chr5  | 122430225 | 122430831 | 0.184 | 7  | 0.24 | PRDM6 (+)        | 0     | 0     |
| chr1  | 236849379 | 236850242 | 0.182 | 7  | 0.25 | ACTN2 (+)        | 0     | 0     |
| chr5  | 87968108  | 87968668  | 0.182 | 5  | 0.20 | LINC00461 (-)    | 0     | 0     |
| chr2  | 162273427 | 162274809 | 0.178 | 7  | 0.25 | TBR1 (+)         | 0     | 0     |
| chr19 | 50706473  | 50706884  | 0.176 | 6  | 0.24 | MYH14 (+)        | 1     | 0     |

|       |           |           |       |    |      |                |        |      |
|-------|-----------|-----------|-------|----|------|----------------|--------|------|
| chr5  | 72598855  | 72599796  | 0.171 | 6  | 0.24 | TMEM174 (+)    | 127884 | 0    |
| chr4  | 187646354 | 187646939 | 0.170 | 5  | 0.24 | FAT1 (-)       | 1366   | 0    |
| chr4  | 113441693 | 113442429 | 0.168 | 5  | 0.23 | NEUROG2 (-)    | 4364   | 1753 |
| chr2  | 223176596 | 223177018 | 0.166 | 5  | 0.20 | CCDC140 (+)    | 6659   | 0    |
| chr13 | 112716613 | 112717254 | 0.163 | 5  | 0.22 | LINC00403 (+)  | 0      | 0    |
| chr3  | 147126111 | 147126971 | 0.163 | 10 | 0.23 | ZIC1 (+)       | 210    | 18   |
| chr11 | 88241584  | 88242498  | 0.159 | 5  | 0.22 | GRM5-AS1 (+)   | 0      | 0    |
| chr7  | 97360605  | 97361211  | 0.156 | 5  | 0.27 | TAC1 (+)       | 60     | 0    |
| chr1  | 50890143  | 50891205  | 0.155 | 6  | 0.23 | DMRTA2 (-)     | 1023   | 0    |
| chr1  | 91182205  | 91182866  | 0.145 | 8  | 0.22 | BARHL2 (-)     | 0      | 0    |
| chr12 | 63543821  | 63544867  | 0.144 | 5  | 0.22 | AVPR1A (-)     | 0      | 0    |
| chr18 | 5197378   | 5197569   | 0.144 | 5  | 0.21 | C18orf42 (-)   | 122    | 0    |
| chr2  | 175193367 | 175194089 | 0.143 | 6  | 0.20 | LINC01305 (+)  | 0      | 0    |
| chr12 | 22094553  | 22095192  | 0.142 | 6  | 0.24 | ABCC9 (-)      | 4924   | 0    |
| chr3  | 147127183 | 147129288 | 0.142 | 11 | 0.21 | ZIC1 (+)       | 0      | 0    |
| chr13 | 112720917 | 112723591 | 0.136 | 18 | 0.23 | SOX1 (+)       | 0      | 0    |
| chr17 | 47075165  | 47075890  | 0.133 | 5  | 0.21 | IGF2BP1 (+)    | 0      | 0    |
| chr6  | 106428947 | 106429669 | 0.130 | 8  | 0.25 | PRDM1 (+)      | 104526 | 0    |
| chr6  | 6004454   | 6005220   | 0.128 | 6  | 0.21 | NRN1 (-)       | 0      | 0    |
| chr13 | 79169704  | 79171479  | 0.127 | 15 | 0.22 | RNF219-AS1 (+) | 0      | 0    |
| chr12 | 103358609 | 103358891 | 0.127 | 6  | 0.21 | ASCL1 (+)      | 4314   | 358  |
| chr1  | 53308587  | 53309271  | 0.125 | 6  | 0.28 | ZYG11A (+)     | 0      | 0    |

|       |           |           |       |    |      |              |       |   |
|-------|-----------|-----------|-------|----|------|--------------|-------|---|
| chr2  | 162279954 | 162281121 | 0.123 | 6  | 0.23 | TBR1 (+)     | 0     | 0 |
| chr2  | 227700104 | 227700578 | 0.119 | 7  | 0.26 | RHBDD1 (+)   | 93    | 0 |
| chr1  | 197887285 | 197888315 | 0.118 | 8  | 0.20 | LHX9 (+)     | 0     | 0 |
| chr8  | 145910536 | 145911670 | 0.112 | 8  | 0.21 | ZNF251 (-)   | 34624 | 0 |
| chr3  | 27765222  | 27765556  | 0.110 | 5  | 0.21 | EOMES (-)    | 1015  | 0 |
| chr5  | 16179002  | 16179670  | 0.109 | 5  | 0.25 | MARCH11 (-)  | 0     | 0 |
| chr14 | 29235894  | 29237490  | 0.107 | 16 | 0.25 | FOXG1 (+)    | 0     | 0 |
| chr10 | 22634028  | 22634612  | 0.107 | 11 | 0.21 | SPAG6 (+)    | 0     | 0 |
| chr5  | 112823161 | 112824298 | 0.101 | 5  | 0.25 | MCC (-)      | 0     | 0 |
| chr15 | 40212096  | 40212791  | 0.096 | 5  | 0.24 | GPR176 (-)   | 0     | 0 |
| chr8  | 24771115  | 24771655  | 0.096 | 6  | 0.25 | NEFM (+)     | 0     | 0 |
| chr5  | 72715454  | 72716132  | 0.095 | 7  | 0.25 | FOXD1 (-)    | 25953 | 0 |
| chr6  | 100912812 | 100913602 | 0.093 | 7  | 0.20 | SIM1 (-)     | 1260  | 0 |
| chr13 | 25745396  | 25745996  | 0.091 | 5  | 0.26 | AMER2 (-)    | 0     | 0 |
| chr15 | 30114285  | 30115309  | 0.086 | 10 | 0.25 | TJP1 (-)     | 0     | 0 |
| chr11 | 2291250   | 2292014   | 0.081 | 8  | 0.23 | ASCL2 (-)    | 0     | 0 |
| chr5  | 42951701  | 42952379  | 0.074 | 5  | 0.24 | FLJ32255 (-) | 33122 | 0 |
| chr20 | 21377661  | 21378237  | 0.059 | 8  | 0.20 | NKX2-4 (-)   | 0     | 0 |
| chr1  | 47882255  | 47882749  | 0.031 | 5  | 0.20 | FOXE3 (+)    | 0     | 0 |

---

**Human Reference Genome: hg19; Estimate value represents extend of methylation change (methylation difference between groups); Nearest gene shows 5'-3' (+) and 3'-5' (-) strands; Distance to nearest feature is presented in bps; Significant regions: Probes>5, Estimate > 20%, p-value<0.05**
